# Supplementary material
Source: ML conference proceedings conference paper supplement (https://openaccess.thecvf.com/content/CVPR2024/html/Li_Global_and_Local_CVPR_2024_paper.html)
Supplement: Supplementary file 1 [file Li_Global_and_Local_CVPR_2024_supplemental.pdf]

# Global and Local Prompts Cooperation via Optimal Transport for Federated Learning Supplementary Materials

## Supplementary organization:

|                                                              |          |
|--------------------------------------------------------------|----------|
| <b>A Method Details</b>                                      | <b>1</b> |
| A.1 Efficient Scaling Dykstra’s Algorithm . . . . .          | 1        |
| A.2 Training Process . . . . .                               | 2        |
| <b>B Experimental Details</b>                                | <b>2</b> |
| B.1. Details of Dataset Setup . . . . .                      | 2        |
| B.2 Implementation Details . . . . .                         | 3        |
| <b>C Additional Experiments Results</b>                      | <b>4</b> |
| C.1. Model Evaluation on Feature Shifts . . . . .            | 4        |
| C.2. Model Evaluation on Feature & Label Shifts . . . . .    | 4        |
| C.3. Effect of Parameter $\gamma$ in Unbalanced OT . . . . . | 4        |
| C.4. Effect of Heterogeneity in Label Distribution . . . . . | 5        |
| C.5. Learning Curves . . . . .                               | 5        |
| <b>D Visualization</b>                                       | <b>5</b> |
| D.1. Visualizations of Transport Plans . . . . .             | 5        |
| D.2 T-SNE Projection of Prompts. . . . .                     | 6        |
| <b>E Generalization Bound</b>                                | <b>8</b> |
| E.1. Key Lemmas . . . . .                                    | 8        |
| E.2. Proof of Theorem 1 . . . . .                            | 9        |

## A. Method Details

### A.1. Efficient Scaling Dykstra’s Algorithm

As introduced in [6], Problem (8) can be solved by a fast implementation of Dykstra’s Algorithm by only performing matrix-vector multiplications, which is very similar to the widely-used and efficient Sinkhorn Algorithm [13]. The details of this algorithm are shown in Algorithm 1.

---

#### Algorithm 1: Efficient Scaling Dykstra’s algorithm

---

**Input:** Cost matrix  $C$ , marginal constraints vectors  $\alpha$  and  $\beta$ , entropic regularization weight  $\lambda$ .

- 1 Initialize:  $Q \leftarrow e^{-C/\lambda}$ ,  $v^{(0)} \leftarrow \mathbb{1}_\beta$ ,  $\Delta_v = \infty$ ,  $\epsilon = 0.001$ ;
- 2 Compute:  $Q_\alpha \leftarrow \frac{Q}{\text{diag}(\alpha)\mathbb{1}_{|\alpha|\times|\beta|}}$ ,  $Q_\beta^\top \leftarrow \frac{Q^\top}{\text{diag}(\beta)\mathbb{1}_{|\beta|\times|\alpha|}}$ ;
- 3 **for**  $n = 1, 2, 3, \dots$  **do**
- 4  $u^{(n)} \leftarrow \min \left( \frac{\mathbb{1}_{|\alpha|}}{Q_\alpha v^{(n-1)}}, \mathbb{1}_{|\alpha|} \right)$ ;
- 5  $v^{(n)} \leftarrow \frac{\mathbb{1}_{|\beta|}}{Q_\beta^\top u^{(n)}}$ ;
- 6  $\Delta_v = |v^{(n)} - v^{(n-1)}|$ ;
- 7 **if**  $\Delta_v < \epsilon$  **then**
- 8 | break
- 9 **end**
- 10 **end**
- 11 **return**  $\text{diag}(u^{(n)})Q\text{diag}(v^{(n)})$

---

## A.2. Training Process

Here, we provide detailed descriptions of the algorithm for our FedOTP, as shown in Algorithms 2. For each communication round  $t$ , the selected clients perform local training by training global and local prompts  $P_i^t = [P_g^t, P_{l,i}^t]$  through unbalanced OT at the same time. Then the updated global prompts  $P_{g,i}^t$  are sent to the server for aggregation.

---

### Algorithm 2: FedOTP: Federated Prompts Cooperation via Optimal Transport

---

**Input:** Communication rounds  $T$ , local epochs  $R$ , client number  $N$ , local dataset  $D_i$ , sample numbers  $m_i$ , pre-trained CLIP model  $g(\cdot)$  and  $h(\cdot)$ , class number  $K$ , learning rate  $\eta$ , temperature of Softmax  $\tau$ .

- 1 Initialize parameters  $P_i^0 = [P_g^0, P_{l,i}^0]$ ;
- 2 **for** each communication round  $t \in \{1, \dots, T\}$  **do**
- 3     Sample a client set  $C^t \subset \{1, \dots, N\}$ ;
- 4     **for** each client  $i \in C^t$  **do**
- 5         Initialize  $P_i^{t,0} = [P_g^{t-1}, P_{l,i}^{t-1}]$ ;
- 6         **for** each local epoch  $r \in \{1, \dots, R\}$  **do**
- 7             Sample a mini-batch  $B_i \in D_i$ ;
- 8             Obtain a visual feature map  $G_m$  with the visual encoder  $g(x) (x \in B_i)$ ;
- 9             Obtain textual features  $H_k$  of each class with the textual encoder  $\{h(P_{i,k}^{t,r-1})\}_{k=1}^K$ ;
- 10             Calculate the cost matrix  $C_k = 1 - G_m^\top H_k$  of each class;
- 11             Solve Problem (8) through Algorithm 1 and obtain Wasserstein distance  $d_{C,k} = \langle T_k^*, C_k \rangle$ ;
- 12             Calculate the classification probability  $q(y = k | \mathbf{x}) = \frac{\exp((1-d_{C,k})/\tau)}{\sum_{c=1}^K \exp((1-d_{C,c})/\tau)}$ ;
- 13             Update the parameters of prompts  $P_i^{t,r} \leftarrow P_i^{t,r-1} - \eta \nabla \mathcal{L}_{D_i}(P_i^{t,r-1})$ ;
- 14         **end**
- 15     **end**
- 16     Aggregate the global prompt  $P_g^t = \sum_{i \in C^t} \frac{m_i}{\sum_{j \in C^t} m_j} P_{g,i}^{t,R}$ ;
- 17 **end**
- 18 **return**  $P_i = [P_g, P_{l,i}]$

---

## B. Experimental Details

### B.1. Details of Dataset Setup

We select nine representative visual classification datasets as our benchmark. The detailed statistics of each dataset are shown in Table A1, including the original tasks, the number of classes, the size of training and testing samples, and the number of domains. As for datasets with multiple domains, Office-Caltech10 is a standard benchmark dataset consisting of four

Table A1. The detailed statistics of datasets used in experiments.

| Dataset               | Task                             | Classes | Training Size | Testing Size | Domains |
|-----------------------|----------------------------------|---------|---------------|--------------|---------|
| Caltech101 [20]       | Object recognition               | 100     | 4,128         | 2,465        | 1       |
| Flowers102 [54]       | Fine-grained flowers recognition | 102     | 4,093         | 2,463        | 1       |
| OxfordPets [56]       | Fine-grained pets recognition    | 37      | 2,944         | 3,669        | 1       |
| Food101 [3]           | Fine-grained food recognition    | 101     | 50,500        | 30,300       | 1       |
| DTD [11]              | Texture recognition              | 47      | 2,820         | 1,692        | 1       |
| CIFAR-10 [36]         | Image Classification             | 10      | 50,000        | 10,000       | 1       |
| CIFAR-100 [36]        | Image Classification             | 100     | 50,000        | 10,000       | 1       |
| DomainNet [58]        | Image recognition                | 10      | 18278         | 4573         | 6       |
| Office-Caltech10 [25] | Image recognition                | 10      | 2025          | 508          | 4       |

domains, namely Amazon, Caltech, DSLR, and WebCam, which are acquired using different camera devices or in different real environments with various backgrounds. DomainNet is a large-scale dataset consisting of six domains, namely Clipart, Infograph, Painting, Quickdraw, Real, and Sketch. We selected 10 classes from each of these two datasets for training. Some examples of raw instances of these two datasets can be found in Figure A1. For a clearer illustration, we visualize the three Non-IID settings employed in our paper in Figure A2.

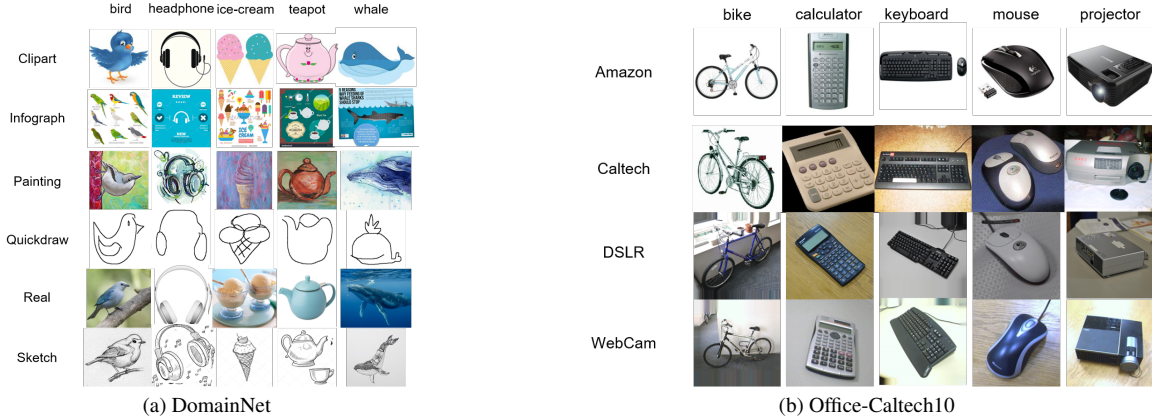

Figure A1. Examples of raw instances from two datasets with multiple domains: DomainNet (left) and Office-Caltech10 (right). We present five classes for each dataset to show the feature shift across their sub-datasets.

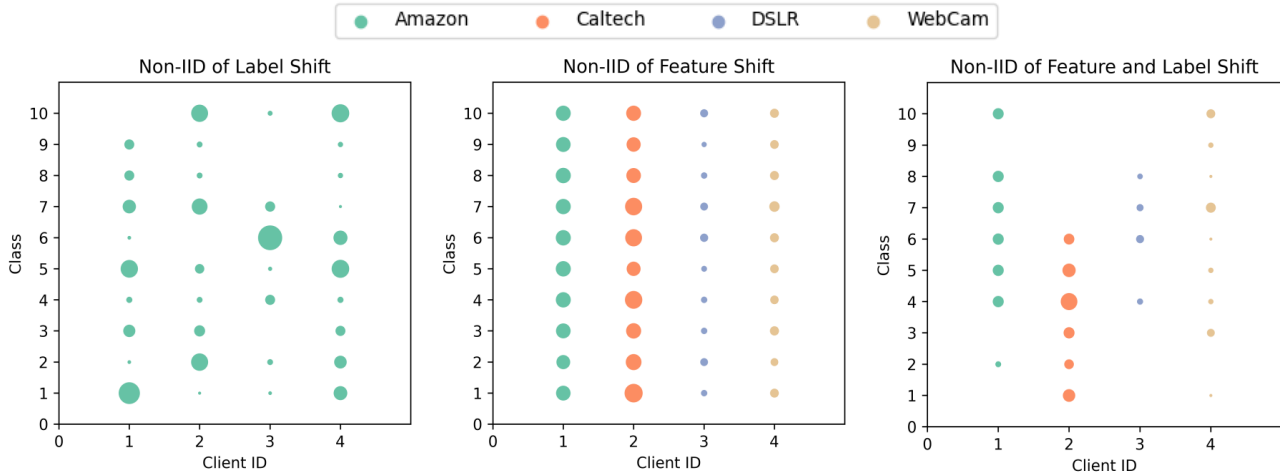

Figure A2. Visualization of three Non-IID settings on the Office-Caltech10 dataset. Each dot represents a set of samples within specific classes assigned to a client, with the dot size indicating the number of samples. The feature shifts are denoted by different colors.

## B.2. Implementation Details

All input images across datasets are resized to  $224 \times 224$  pixels and further divided into  $14 \times 14$  patches with a dimension of 768. Regarding the hyperparameters for solving OT, we set the entropic regularization weight in Problem Eq. (8) as  $\lambda = 0.1$  for all datasets. The maximum iteration number  $n$  for Algorithm 1 is set to 100, and we implement early stopping when the absolute update value  $\Delta_v$  is less than 0.001. For the setting of learnable prompts, the length of prompt vectors  $s$  is set to 16 with a dimension of 512, “end” token position, and “random” initialization. Batch sizes are set to 32 for training and 100 for testing. All experiments are conducted with Pytorch [57] on NVIDIA A40 GPUs.

## C. Additional Experiments Results

### C.1. Model Evaluation on Feature Shifts

In Table A2, we compared the performance on Office-Caltech10 and DomainNet datasets under the presence of feature shift, where each client is assigned data from distinct domains while sharing the same label distribution. Our method achieved the highest average accuracies 99.16% and 94.55% on Office-Caltech10 and DomainNet, respectively.

Table A2. Experimental results on Office-Caltech10 and DomainNet datasets with feature shift.

| Datasets<br>Domains                    | Office-Caltech10 |              |            |            |              | DomainNet    |              |              |              |              |              |              |
|----------------------------------------|------------------|--------------|------------|------------|--------------|--------------|--------------|--------------|--------------|--------------|--------------|--------------|
|                                        | A                | C            | D          | W          | Avg.         | C            | I            | P            | Q            | R            | S            | Avg.         |
| <i>Local Training</i>                  |                  |              |            |            |              |              |              |              |              |              |              |              |
| Zero-Shot CLIP [60]                    | 19.3             | 18.2         | 21.9       | 18.6       | 19.50        | 49.92        | 47.15        | 53.63        | 31.3         | 48.4         | 50.18        | 46.76        |
| CoOp [78]                              | 96.38            | 97.24        | 100        | 98.31      | 97.98        | 98.32        | 83.01        | 98.18        | 82.37        | 98.21        | 97.70        | 92.95        |
| <i>Prompt-based Federated Learning</i> |                  |              |            |            |              |              |              |              |              |              |              |              |
| PromptFL [27]                          | 96.41            | 96.39        | 96.90      | 100        | 97.42        | 98.23        | 79.91        | 97.89        | 66.52        | 96.83        | 97.31        | 89.45        |
| PromptFL+FedProx [42]                  | 97.93            | 97.21        | 96.89      | 100        | 98.01        | 98.45        | 72.32        | 96.00        | 63.51        | 96.08        | 98.04        | 87.40        |
| FedOTP (Ours)                          | <b>97.92</b>     | <b>98.68</b> | <b>100</b> | <b>100</b> | <b>99.16</b> | <b>98.93</b> | <b>84.52</b> | <b>98.89</b> | <b>87.87</b> | <b>98.64</b> | <b>98.42</b> | <b>94.55</b> |

### C.2. Model Evaluation on Feature & Label Shifts

In this set of experiments, we investigated scenarios involving both feature shifts and label shifts by dividing data within a domain into three clients based on the Dirichlet distribution with  $\alpha = 0.1$  for the Office-Caltech10 dataset. We calculated the mean and standard deviation of clients in the same domain, and the outcomes are presented in Table A3. Comparing these results with those in Table A2, we can observe that the introduction of label shift leads to a performance decrease across all methods, with federated learning methods employing a shared prompt experiencing the most significant decline. In spite of this, our FedOTP consistently achieves the highest average accuracy, demonstrating its capability to utilize both global and local prompts to capture general domain-invariant and specific domain-specific knowledge for effective adaptation to extreme data heterogeneity.

Table A3. Experimental results on Office-Caltech10 dataset with feature & label shifts.

| Datasets<br>Domains                    | Office-Caltech10  |                    |                   |                   |                   |
|----------------------------------------|-------------------|--------------------|-------------------|-------------------|-------------------|
|                                        | Amazon            | Caltech            | DSLR              | Webcam            | Avg.              |
| <i>Local Training</i>                  |                   |                    |                   |                   |                   |
| Zero-Shot CLIP [60]                    | 8.45±1.49         | 6.01±4.25          | 12.92±9.15        | 6.48±4.82         | 8.46±6.26         |
| CoOp [78]                              | <b>25.59±6.60</b> | <b>36.23±16.97</b> | 30.30±5.18        | 22.56±5.46        | 28.67±11.13       |
| <i>Prompt-based Federated Learning</i> |                   |                    |                   |                   |                   |
| PromptFL [27]                          | 10.92±4.36        | 10.37±12.63        | 15.45±15.34       | 15.90±17.33       | 13.16±13.60       |
| PromptFL+FedProx [42]                  | 11.05±4.70        | 12.04±10.65        | 19.70±21.74       | 12.56±12.72       | 13.84±14.29       |
| FedOTP (Ours)                          | 23.59±4.74        | 31.64±5.25         | <b>43.94±5.67</b> | <b>35.51±9.19</b> | <b>33.67±9.76</b> |

### C.3. Effect of Parameter $\gamma$ in Unbalanced OT

In this subsection, we delved into the effect of parameter  $\gamma$  in unbalanced OT, which regulates the mapping size of prompts on the feature map. We conducted experiments on the Pathological Non-IID setting across four datasets with varying numbers of shots and different values of the parameter  $\gamma$  in our FedOTP. Specifically, we set  $R = 5$  and  $T = 10$  for these experiments. The results presented in Table A4 reveal a notable trend: as the parameter  $\gamma$  decreases, the overall performance initially increases and subsequently decreases. Interestingly, the majority of optimal results are observed at  $\gamma = 0.8$  or  $\gamma = 0.7$ . This observation implies that the optimal alignment between global and local prompts and the feature map is achieved when the mapping size of prompts on the feature map is around 70% – 80%. Consequently, we adopt  $\gamma = 0.8$  in other experiments.

Table A4. Quantitative comparisons on the Pathological Non-IID setting across varying numbers of shots with different parameter  $\gamma$  in our FedOTP over 10 clients.

| Dataset    | shot number | 1                 | 0.9               | 0.8               | 0.7               | 0.6               | 0.5               |
|------------|-------------|-------------------|-------------------|-------------------|-------------------|-------------------|-------------------|
| DTD        | 1 shot      | 74.22±0.75        | 73.72±0.79        | 75.75±0.64        | 72.81±0.42        | <b>77.36±0.98</b> | 77.22±1.46        |
|            | 2 shots     | 81.89±0.76        | 84.03±0.57        | 84.64±0.29        | <b>85.50±0.35</b> | 80.39±0.24        | 82.47±0.40        |
|            | 4 shots     | 85.06±0.91        | 85.75±0.63        | 86.69±0.61        | <b>87.67±0.70</b> | 86.58±0.51        | 85.86±0.44        |
|            | 8 shots     | 88.64±0.31        | 88.22±0.30        | 89.77±0.24        | <b>90.25±0.74</b> | 89.17±0.53        | 89.67±0.51        |
|            | 16 shots    | 90.51±0.11        | 91.02±0.48        | <b>91.31±0.59</b> | 90.94±0.25        | 89.97±0.34        | 90.33±0.51        |
| Caltech101 | 1 shot      | 89.68±1.19        | 92.13±0.58        | <b>92.54±0.71</b> | 91.53±0.55        | 90.10±1.74        | 90.67±0.44        |
|            | 2 shots     | <b>95.05±0.49</b> | 93.89±0.35        | 94.45±0.32        | 94.37±0.43        | 93.89±0.65        | 94.68±0.92        |
|            | 4 shots     | 96.02±0.36        | 96.64±0.41        | <b>97.02±0.36</b> | 96.68±0.46        | 96.38±0.42        | 96.66±0.37        |
|            | 8 shots     | 96.74±0.21        | 96.79±0.24        | 96.91±0.16        | 96.95±0.26        | 97.22±0.33        | <b>97.34±0.18</b> |
|            | 16 shots    | 97.72±0.14        | 97.69±0.17        | 97.39±0.11        | 97.58±0.23        | 97.74±0.19        | <b>97.83±0.18</b> |
| Flowers102 | 1 shot      | 86.68±1.93        | 85.77±0.74        | 87.42±0.92        | 88.43±0.90        | <b>89.14±1.18</b> | 85.56±1.21        |
|            | 2 shots     | 93.09±1.26        | <b>93.96±0.48</b> | 93.31±0.55        | 93.13±0.26        | 93.70±0.49        | 93.56±0.86        |
|            | 4 shots     | 95.46±0.55        | <b>96.23±0.44</b> | 95.51±0.30        | 95.89±0.50        | 96.17±0.47        | 96.16±0.34        |
|            | 8 shots     | 97.53±0.24        | 97.49±0.19        | <b>98.23±0.32</b> | 98.11±0.27        | 97.24±0.28        | 97.40±0.64        |
|            | 16 shots    | 98.86±0.15        | 98.30±0.55        | <b>99.11±0.11</b> | 98.88±0.17        | 99.03±0.12        | 98.93±0.18        |
| OxfordPets | 1 shot      | 95.82±1.16        | 94.26±0.38        | 96.18±0.71        | <b>96.37±0.79</b> | 94.21±0.53        | 95.97±0.42        |
|            | 2 shots     | <b>97.73±0.57</b> | 96.12±0.32        | 97.50±1.02        | 97.49±0.45        | 97.60±0.40        | 97.27±0.19        |
|            | 4 shots     | 98.11±1.15        | 98.46±0.64        | <b>98.82±0.11</b> | 98.51±0.10        | 98.52±0.25        | 98.43±0.28        |
|            | 8 shots     | 98.73±0.27        | <b>99.02±0.38</b> | 98.71±0.16        | 98.74±0.18        | 98.54±0.22        | 98.63±0.13        |
|            | 16 shots    | 99.04±0.16        | 98.82±0.25        | <b>99.27±0.23</b> | 99.21±0.19        | 99.04±0.27        | 98.81±0.21        |

#### C.4. Effect of Heterogeneity in Label Distribution

In addressing the core challenge of data heterogeneity in personalized federated learning, FedOTP consistently outperforms benchmark methods across various settings. Now, we investigated the effect of heterogeneity in label distribution by considering a range of  $\alpha$  values of Dirichlet distribution, specifically  $\alpha \in \{0.1, 0.3, 0.5, 1, 5, 10\}$  for CIFAR-100 datasets. It's worth noting that a smaller  $\alpha$  implies a higher degree of data heterogeneity in these experiments. The results presented in Table A5 clearly indicate that as the degree of data heterogeneity increases, the performance of federated learning methods with a shared prompt decreases while the performance of CoOp and our FedOTP improves. Among these methods, FedOTP outperforms them in every case and demonstrates remarkable robustness. These findings underscore the effectiveness of FedOTP in overcoming label distribution heterogeneity across a diverse range of scenarios.

#### C.5. Learning Curves

To assess the convergence of our method, we plotted test accuracy curves with  $R = 1$  and  $T = 50$  for different methods across four datasets, as illustrated in Figure A3. Compared to other methods, FedOTP exhibits notable characteristics of accelerated convergence and enhanced stability, evident from the smaller fluctuations in test accuracy.

### D. Visualization

#### D.1. Visualizations of Transport Plans

To facilitate a comparative analysis between FedOTP, PromptFL, and Local models, we examined visualizations of similarity between textual features and feature maps in Figure 2. Here, we provided visualization examples showcasing transport plans  $T$  associated with global and local prompts of FedOTP across different  $\gamma$  values. We converted each transport plan into colorful heatmaps, resized and overlaid them on the original image. The comparisons between heatmaps of transport plans

Table A5. Quantitative comparisons on CIFAR-100 dataset with different  $\alpha$  of the Dirichlet setting.

| Dataset<br># $\alpha$                  | CIFAR-100         |                   |                   |                   |                   |                   |
|----------------------------------------|-------------------|-------------------|-------------------|-------------------|-------------------|-------------------|
|                                        | 0.1               | 0.3               | 0.5               | 1                 | 5                 | 10                |
| <b>Local Training</b>                  |                   |                   |                   |                   |                   |                   |
| Zero-Shot CLIP [60]                    | 65.22±0.32        | 64.92±0.53        | 65.78±0.41        | 63.93±0.16        | 64.01±0.27        | 65.07±0.35        |
| CoOp [78]                              | 62.01±0.29        | 74.83±0.45        | 51.72±0.42        | 47.03±0.37        | 41.03±0.23        | 41.37±0.19        |
| <b>Prompt-based Federated Learning</b> |                   |                   |                   |                   |                   |                   |
| PromptFL [27]                          | 72.45±0.64        | 73.67±0.56        | 74.37±0.18        | 73.95±0.14        | 74.68±0.05        | 74.43±0.08        |
| PromptFL+FedProx [42]                  | 72.57±0.54        | 71.11±0.91        | 74.45±0.19        | 74.19±0.06        | 74.23±0.09        | 74.53±0.07        |
| FedOTP (Similarity Averaging)          | 78.68±0.17        | 75.70±0.27        | 75.28±0.12        | 74.88±0.16        | 74.48±0.05        | 74.31±0.39        |
| FedOTP (Classical OT)                  | 79.93±0.19        | 77.86±0.09        | 75.76±0.12        | 75.38±0.08        | 75.01±0.05        | 74.73±0.05        |
| FedOTP (Unbalanced OT)                 | <b>80.56±0.12</b> | <b>78.03±0.08</b> | <b>76.75±0.10</b> | <b>76.17±0.13</b> | <b>75.75±0.03</b> | <b>75.52±0.06</b> |

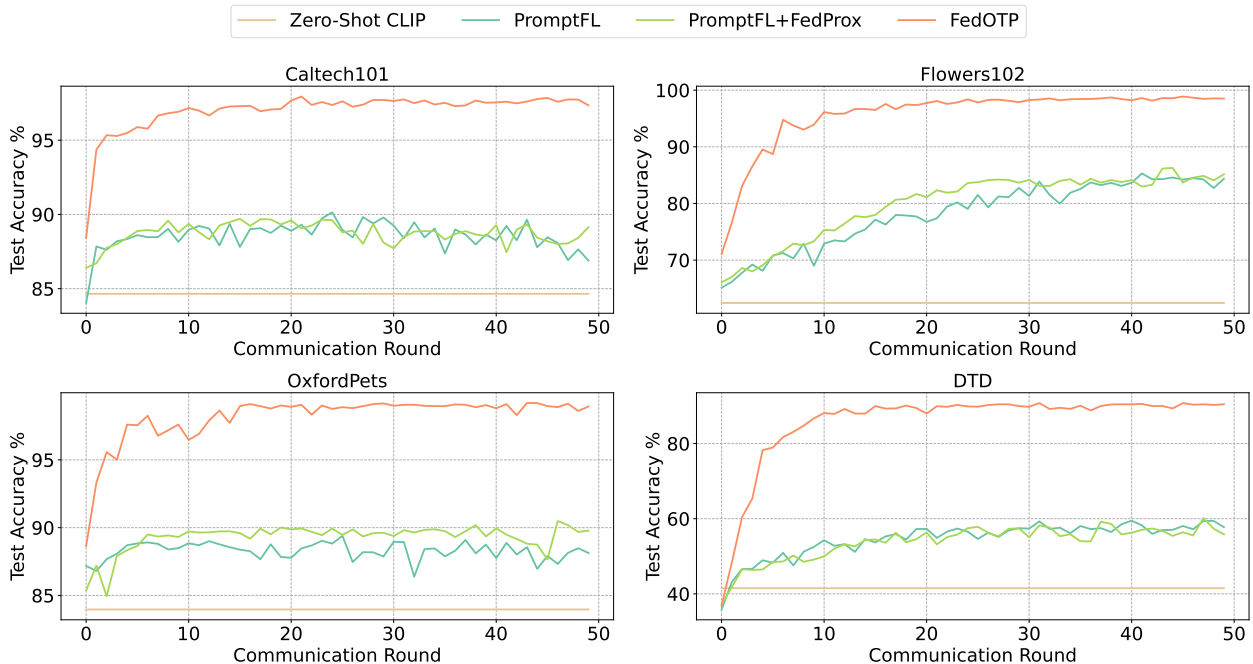

Figure A3. Accuracy curves and convergence behavior of FedOTP and other baselines on four datasets over 10 clients.

with different  $\gamma$  in Caltech101 dataset is presented in Figure A4. Upon observation, we noted that when  $\gamma = 1$ , the transport plans related to global and local prompts exhibit complementary, as each image patch is assigned to prompts due to the equality constraints of OT. This may result in the integration of objects and backgrounds on the global part, observable in classes like “Camera” and “Laptop”. In contrast, as  $\gamma$  decreases, prompts focus on a smaller range of patches and primarily center on the patches of main objects rather than backgrounds, further supporting the claim that FedOTP can effectively regulate the mapping size of prompts on the feature map.

usiv

## D.2. T-SNE Projection of Prompts.

To examine how the learned prompts form a meaningful representation across the client space, we employed the t-SNE algorithm [71] to project prompts onto a 2D plane. Following [39, 62], we divided CIFAR-100 dataset into 100 clients. In detail, each coarse label was assigned to five clients, and the corresponding fine labels were uniformly distributed among those



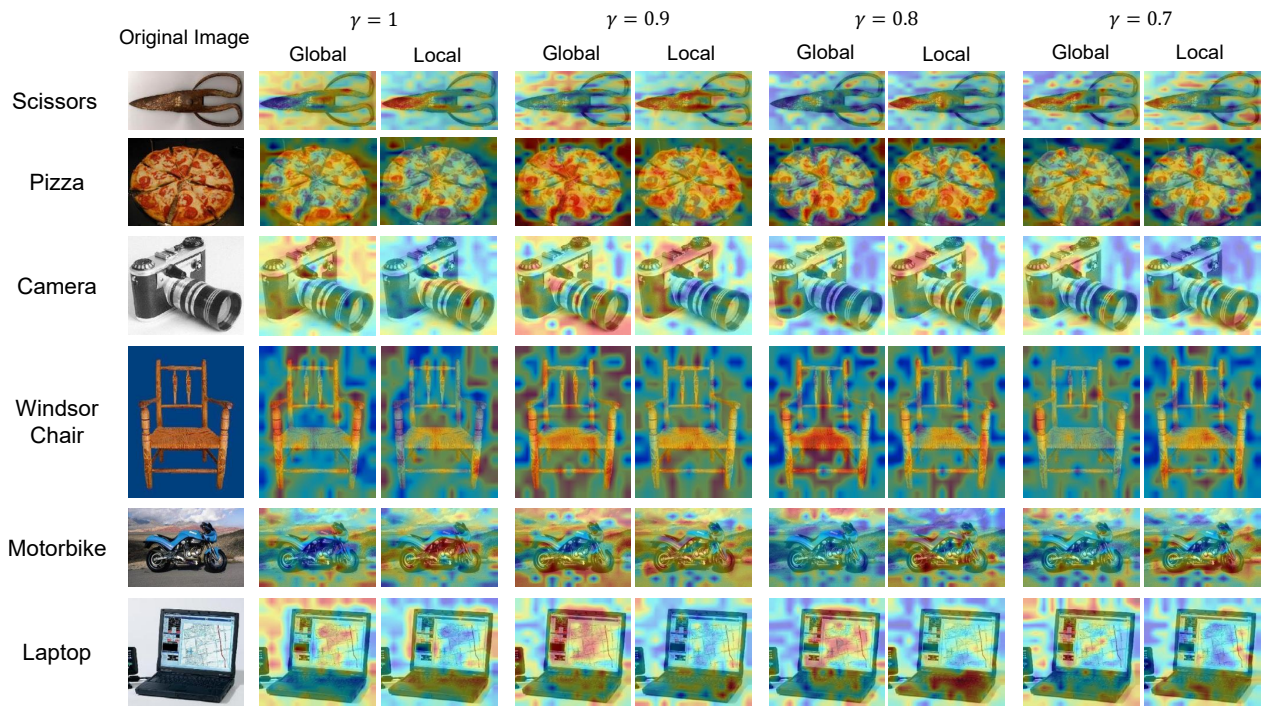

(a) Artifacts in Caltech101 dataset.

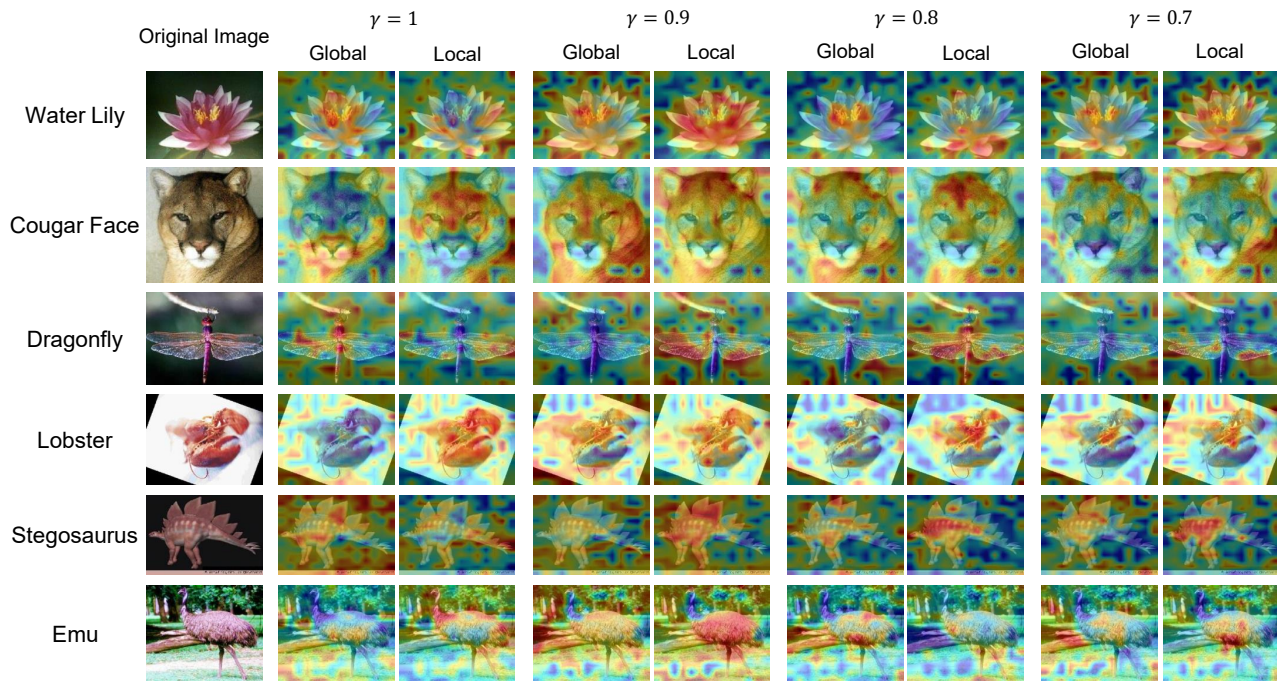

(b) Organisms in Caltech101 dataset.

Figure A4. Heatmaps of transport plans related to global and local prompts of FedOTP with different  $\gamma$  in Caltech101 dataset. “Global” denotes the transport plans related to global prompts and “Local” refers to local prompts.

selected clients. After training these clients with FedOTP, we visualized their local prompts obtained from local training, and we used different colors to represent various coarse labels. As shown in Figure A5, local prompts from clients with the same coarse label are clustered together and positioned far from those with different coarse labels. These results further illustrate that in FedOTP, the acquired local prompts are tailored to capture client-specific category characteristics.

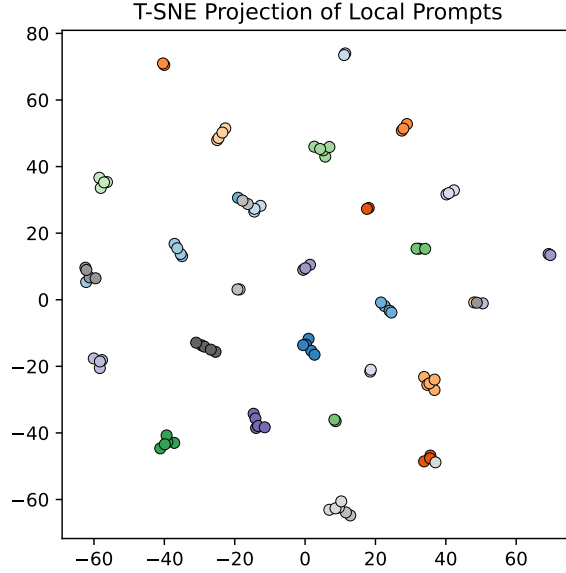

Figure A5. T-SNE projection of local prompts from FedOTP in CIFAR-100 dataset.

## E. Generalization Bound

### E.1. Key Lemmas

**Lemma 1 (McDiarmid’s Inequality [53])** Let  $X_1, \dots, X_n$  be independent random variables, where  $X_i$  has range  $\mathcal{X}_i$ . Let  $g : \mathcal{X}_1 \times \dots \times \mathcal{X}_n \rightarrow \mathbb{R}$  be any function with the  $(a_1, \dots, a_n)$ -bounded difference property: for every  $i = 1, \dots, n$  and  $x_1, \dots, x_n, x'_i \in \mathcal{X}_1 \times \dots \times \mathcal{X}_n$ , we have

$$\sup_{x_i \in \mathcal{X}_i} |g(x_1, \dots, x_i, \dots, x_n) - g(x_1, \dots, x'_i, \dots, x_n)| \leq a_i. \quad (13)$$

Then for any  $\varepsilon > 0$ ,

$$\mathbb{P}[g(X_1, \dots, X_n) - \mathbb{E}[g(X_1, \dots, X_n)] \geq \varepsilon] \leq \exp\left(-\frac{2\varepsilon^2}{\sum_{i=1}^n a_i^2}\right). \quad (14)$$

**Lemma 2 (Rademacher Complexity [53])** Given a space  $\mathcal{B}$  and a fixed distribution  $D_B$ , let  $\{b_1, \dots, b_m\}$  be a set of examples drawn i.i.d. from  $D_B$ . Let  $\mathcal{F}$  be a class of functions  $f : \mathcal{B} \rightarrow \mathbb{R}$ , and the Rademacher Complexity of  $\mathcal{F}$  is defined as follows:

$$\mathfrak{R}_{D_B}(\mathcal{B}) = \frac{1}{m} \mathbb{E}_\sigma \left[ \sup_{b \in \mathcal{B}} \sum_{i=1}^m \sigma_i b_i \right]. \quad (15)$$

where  $\sigma_1, \dots, \sigma_m$  are independent random variables uniformly chosen from  $\{-1, 1\}$ .



## E.2. Proof of Theorem 1

*Proof:* For the left side of Theorem 1, we have

$$\begin{aligned}
& \left| \sum_{i=1}^N \frac{m_i}{M} \left( \mathcal{L}_{\hat{\mathcal{D}}_i}(\hat{P}_g, \hat{P}_{l,i}) - \mathcal{L}_{\mathcal{D}_i}(P_g^*, P_{l,i}^*) \right) \right| \\
&= \left| \sum_{i=1}^N \frac{m_i}{M} \left( \mathcal{L}_{\hat{\mathcal{D}}_i}(\hat{P}_g, \hat{P}_{l,i}) - \mathcal{L}_{\hat{\mathcal{D}}_i}(P_g^*, P_{l,i}^*) + \mathcal{L}_{\hat{\mathcal{D}}_i}(P_g^*, P_{l,i}^*) - \mathcal{L}_{\mathcal{D}_i}(P_g^*, P_{l,i}^*) \right) \right| \\
&\leq \left| \sum_{i=1}^N \frac{m_i}{M} \left( \mathcal{L}_{\hat{\mathcal{D}}_i}(\hat{P}_g, \hat{P}_{l,i}) - \mathcal{L}_{\hat{\mathcal{D}}_i}(P_g^*, P_{l,i}^*) \right) \right| + \left| \sum_{i=1}^N \frac{m_i}{M} \left( \mathcal{L}_{\hat{\mathcal{D}}_i}(P_g^*, P_{l,i}^*) - \mathcal{L}_{\mathcal{D}_i}(P_g^*, P_{l,i}^*) \right) \right|.
\end{aligned} \tag{16}$$

The objective function is partitioned into two components, and we will bound each of them independently. Concerning the first part in Eq. (16), assuming Assumptions 1 and 2 hold, we obtain

$$\begin{aligned}
& \left| \sum_{i=1}^N \frac{m_i}{M} \left( \mathcal{L}_{\hat{\mathcal{D}}_i}(\hat{P}_g, \hat{P}_{l,i}) - \mathcal{L}_{\hat{\mathcal{D}}_i}(P_g^*, P_{l,i}^*) \right) \right| \\
&\leq \left| \sum_{i=1}^N \frac{m_i}{M} \left( \mathcal{L}_{\hat{\mathcal{D}}_i}(\hat{P}_g, \hat{P}_{l,i}) - \mathcal{L}_{\hat{\mathcal{D}}_i}(\hat{P}_g, P_{l,i}^*) + \mathcal{L}_{\hat{\mathcal{D}}_i}(\hat{P}_g, P_{l,i}^*) - \mathcal{L}_{\hat{\mathcal{D}}_i}(P_g^*, P_{l,i}^*) \right) \right| \\
&\leq \left| \sum_{i=1}^N \frac{m_i}{M} \left( \mathcal{L}_{\hat{\mathcal{D}}_i}(\hat{P}_g, \hat{P}_{l,i}) - \mathcal{L}_{\hat{\mathcal{D}}_i}(\hat{P}_g, P_{l,i}^*) \right) \right| + \left| \sum_{i=1}^N \frac{m_i}{M} \left( \mathcal{L}_{\hat{\mathcal{D}}_i}(\hat{P}_g, P_{l,i}^*) - \mathcal{L}_{\hat{\mathcal{D}}_i}(P_g^*, P_{l,i}^*) \right) \right| \\
&\leq \sum_{i=1}^N \frac{m_i}{M} \mathbb{E}_{(x_i^j, y_i^j) \in \mathcal{D}_i} \left| \ell(f(\hat{P}_g, \hat{P}_{l,i}; x_i^j), y_i^j) - \ell(f(\hat{P}_g, P_{l,i}^*; x_i^j), y_i^j) \right| \\
&+ \sum_{i=1}^N \frac{m_i}{M} \mathbb{E}_{(x_i^j, y_i^j) \in \mathcal{D}_i} \left| \ell(f(\hat{P}_g, P_{l,i}^*; x_i^j), y_i^j) - \ell(f(P_g^*, P_{l,i}^*; x_i^j), y_i^j) \right| \\
&\leq \sum_{i=1}^N \frac{m_i}{M} L \left( \|f(\hat{P}_g, \hat{P}_{l,i}) - f(\hat{P}_g, P_{l,i}^*)\| + \|f(\hat{P}_g, P_{l,i}^*) - f(P_g^*, P_{l,i}^*)\| \right) \\
&\leq \sum_{i=1}^N \frac{m_i}{M} \left( LL_g \|\hat{P}_{l,i} - P_{l,i}^*\| + LL_{l,i} \|\hat{P}_g - P_g^*\| \right) \\
&\leq LL_g A_g + L \sum_{i=1}^N \frac{m_i}{M} L_{l,i} A_{l,i} \leq LL_g A_g + L \left( \sum_{i=1}^N \frac{m_i}{M} \right) \left( \sum_{i=1}^N L_{l,i} A_{l,i} \right) \\
&\leq LL_g A_g + L \sqrt{\left( \sum_{i=1}^N L_{l,i}^2 \right) \left( \sum_{i=1}^N A_{l,i}^2 \right)}.
\end{aligned} \tag{17}$$

For the second part in Eq. (16), replacing  $g(\cdot)$  with  $\sum_{i=1}^N \frac{m_i}{M} \left( \mathcal{L}_{\hat{\mathcal{D}}_i}(P_g^*, P_{l,i}^*) - \mathcal{L}_{\mathcal{D}_i}(P_g^*, P_{l,i}^*) \right)$  in Lemma 1, and setting  $\delta = \exp(-2\varepsilon^2 / \sum_{i=1}^N a_i^2)$ , with a probability at least  $1 - \delta$ , the following inequality holds,

$$\begin{aligned}
& \left| \sum_{i=1}^N \frac{m_i}{M} \left( \mathcal{L}_{\hat{\mathcal{D}}_i}(P_g^*, P_{l,i}^*) - \mathcal{L}_{\mathcal{D}_i}(P_g^*, P_{l,i}^*) \right) \right| \\
&\leq \mathbb{E} \left[ \sum_{i=1}^N \frac{m_i}{M} \left( \mathcal{L}_{\hat{\mathcal{D}}_i}(P_g^*, P_{l,i}^*) - \mathcal{L}_{\mathcal{D}_i}(P_g^*, P_{l,i}^*) \right) \right] + \sqrt{\frac{M}{2} \log \frac{N}{\delta}}.
\end{aligned} \tag{18}$$

Utilizing Lemma 2 and the results in [50], we can get

$$\begin{aligned} \mathbb{E} \left[ \sum_{i=1}^N \frac{m_i}{M} \left( \mathcal{L}_{\hat{\mathcal{D}}_i}(P_g^*, P_{l,i}^*) - \mathcal{L}_{\mathcal{D}_i}(P_g^*, P_{l,i}^*) \right) \right] &\leq \sum_{i=1}^N \frac{m_i}{M} \mathfrak{R}_{\mathcal{D}_i}(\mathcal{H}) \\ &\leq \sum_{i=1}^N \frac{m_i}{M} \sqrt{\frac{dN}{m_i} \log \frac{em_i}{d}} \leq \sum_{i=1}^N \frac{m_i}{M} \sqrt{\frac{dN}{m_i} \log \frac{eM}{d}} \leq \sqrt{\frac{dN}{M} \log \frac{eM}{d}}. \end{aligned} \quad (19)$$

Combining the results in Eq. (18) and Eq. (19), we can get

$$\left| \sum_{i=1}^N \frac{m_i}{M} \left( \mathcal{L}_{\hat{\mathcal{D}}_i}(P_g^*, P_{l,i}^*) - \mathcal{L}_{\mathcal{D}_i}(P_g^*, P_{l,i}^*) \right) \right| \leq \sqrt{\frac{M}{2} \log \frac{N}{\delta}} + \sqrt{\frac{dN}{M} \log \frac{eM}{d}}. \quad (20)$$

Summarizing the results above, we can obtain

$$\begin{aligned} \left| \sum_{i=1}^N \frac{m_i}{M} \left( \mathcal{L}_{\hat{\mathcal{D}}_i}(\hat{P}_g, \hat{P}_{l,i}) - \mathcal{L}_{\mathcal{D}_i}(P_g^*, P_{l,i}^*) \right) \right| &\leq \sqrt{\frac{M}{2} \log \frac{N}{\delta}} + \sqrt{\frac{dN}{M} \log \frac{eM}{d}} + LL_g A_g + L \sqrt{\left( \sum_{i=1}^N L_{l,i}^2 \right) \left( \sum_{i=1}^N A_{l,i}^2 \right)} \\ &= \sqrt{\frac{M}{2} \log \frac{N}{\delta}} + \sqrt{\frac{dN}{M} \log \frac{eM}{d}} + L(L_g A_g + L_l A_l), \end{aligned} \quad (21)$$

where we denote  $L_l = \sqrt{\sum_{i=1}^N L_{l,i}^2}$  and  $A_l = \sqrt{\sum_{i=1}^N A_{l,i}^2}$  for simplicity. ■
